# Supplementary material for: Glyphosate does not substitute for glycine in proteins of actively dividing mammalian cells
Source: BMC Res Notes. 2019 Aug 8;12:494. doi: 10.1186/s13104-019-4534-3 (PMC6686468; doi:10.1186/s13104-019-4534-3)
Supplement: Supplementary file 1 — Additional file 1: Table S1. Kinetics of MDA-MB-231 cell growth in either the presence or absence of 100 mg/L glyphosate. Cell counts are given at day-1 of seeding flasks and following 6-days of continuous culture. Note: no differences in cell numbers were observed between negative control and glyphosate treated cultures. [file 13104_2019_4534_MOESM1_ESM.xlsx]

## Sheet: Nr2_Metadata
Culture	Replicate #	Harvest time point post-treatment	# cells seeded at day-1	# cells at harvest/mL	# cells at harvest Total
Negative Control	1	6 days	1000000	1070000	21400000
Negative Control	2	6 days	1000000	1050000	21000000
Negative Control	3	6 days	1000000	820000	16400000
Glyphosate 100mg/L	1	6 days	1000000	1000000	20000000
Glyphosate 100mg/L	2	6 days	1000000	990000	19800000
Glyphosate 100mg/L	3	6 days	1000000	1210000	24200000
Table S1. Kinetics of MDA-MB-231 cell growth in either the presence or absence of 100mg/L glyphosate.
Cell counts are given at day-1 of seeding flasks and following 6-days of continuous culture. Note: no differences in cell numbers were observed between negative control and glyphosate treated cultures.
